# Supplementary material for: Interaction of Crime Risk across Crime Types in Hotspot Areas
Source: MDPI journal article supplement (doi:10.3390/ijgi12040176), 2023-04-21
Supplement: s1 [file s1]

Archive with 1 entries (1 files):
- ijgi-2220754-supplementary.pdf
